# Supplementary material for: Preparation of a boronate affinity-functionalized metal–organic framework material for selective recognition and separation of glycoproteins at physiological pH
Source: Royal Society of Chemistry journal article supplement (doi:10.1039/d2nj01182d), 2022-01-01
Supplement: d2nj01182d1.pdf [file d2nj01182d1.pdf]

## Supplementary Materials

### Preparation of boronate affinity-functionalized metal-organic framework material for selective recognition and separation of glycoprotein under physiological pH

Baoyue Zhang<sup>a,#</sup>, Xue Chen<sup>a,#</sup>, Jianghua He<sup>b</sup>, Bailin Guo<sup>a</sup>, Sheng Bi<sup>a</sup>, Feng Zhang<sup>a,\*</sup>,  
Miaomiao Tian<sup>a,\*</sup>

<sup>a</sup> College of Chemistry and Chemical Engineering, Harbin Normal University, Harbin 150025,  
P. R. China.

<sup>b</sup> Ruyuan Hec Pharm Co., Ltd. Guangdong Province, Shaoguan 512700, P. R. China.

<sup>#</sup> These authors contributed equally in this work.

#### 1. Experimental

##### 1.1 Equilibrium and adsorption kinetics experiments

The adsorption equilibrium and adsorption kinetics of the material were studied by batch mode experiments. In the study of adsorption kinetics, 5 mg Zr-MOF@S-S@B adsorbent was added into a centrifuge tube with a concentration of 1 mg mL<sup>-1</sup> OVA solution (5 mL, pH 8.5) to investigate the adsorption effect of different oscillation time. In isothermal adsorption test, 5 mg of Zr-MOF@S-S@B adsorbent was added to different concentrations of 5 mL OVA solution (pH 8.5). The adsorbents were separated from the solution, and the supernatant was passed through 0.45 µm filter membranes and detected by a UV-vis spectrophotometer.

---

\* Corresponding authors. E-mail: Zhangfeng@hrbnu.edu.cn (F. Zhang); mmttqq@163.com (M.M. Tian).

25 The adsorption kinetic models were evaluated by the pseudo-first-order kinetic model  
 26 and the pseudo-second-order kinetic model, which are calculated according to Eqn. (1) and  
 27 Eqn. (2), respectively.

$$28 \quad \ln(Q - Q_t) = \ln Q - K_1 t \quad (1)$$

$$29 \quad \frac{t}{Q_t} = \frac{1}{K_2 Q^2} + \frac{t}{Q} \quad (2)$$

30 where  $Q_t$  (mg g<sup>-1</sup>) is the adsorption amount of OVA at time  $t$  (min).  $K_1$  (L min<sup>-1</sup>) and  $K_2$  (mg  
 31 g<sup>-1</sup> min<sup>-1</sup>) are the rate constants of the pseudo-first-order kinetic model and the pseudo-  
 32 second-order kinetic model, respectively. The initial adsorption rate  $h$  (mg g<sup>-1</sup> min<sup>-1</sup>) and the  
 33 half-equilibrium time  $t_{1/2}$  (min) can be calculated from the Eqn. (3) and Eqn. (4).

$$34 \quad h = K_2 Q^2 \quad (3)$$

$$35 \quad t_{1/2} = \frac{1}{K_2 Q} \quad (4)$$

36 The results of isothermal adsorption were evaluated by the Langmuir isothermal model  
 37 and the Freundlich isothermal model. Langmuir and Freundlich adsorption isotherms are  
 38 presented in Eqn. (5) and Eqn. (6), respectively.

$$39 \quad \frac{1}{Q} = \frac{1}{Q_m} + \frac{1}{K_L Q_m C_e} \quad (5)$$

$$40 \quad \lg Q = \lg K_F + \frac{1}{n} \lg C_e \quad (6)$$

41 where  $C_e$  (mg mL<sup>-1</sup>) is the equilibrium concentration of OVA (mg mL<sup>-1</sup>) in the solution,  $Q$   
 42 (mg g<sup>-1</sup>) is the amount of OVA adsorbed at the equilibrium.  $Q_m$  (mg g<sup>-1</sup>) is the maximum  
 43 adsorption capacity of the adsorbent,  $K_L$  (mL mg<sup>-1</sup>) is the Langmuir constant,  $K_F$  (mg g<sup>-1</sup>) is  
 44 the Freundlich constant, and  $1/n$  is the dimensionless constant.

45

## 46 2. Results and discussion

47

## 48 2.1 Adsorption equilibrium and kinetics experiments

49

50        There is an important relationship between adsorption kinetics and adsorption efficiency.  
51 As shown in Fig. S3, Zr-MOF@S-S@B and reach equilibrium at 80 min. Fig. S4 (A) and  
52 S4(B) are the curves of the pseudo-first-order dynamics model and the pseudo-second-order  
53 dynamics model, which are calculated according to Eqs. (1) and (2). Table S1 describes the  
54 relevant data fitting.  $Q_{\text{exp}}$  represents the maximum adsorption of the OVA measured in the  
55 experiment, and  $Q_{\text{tf}}$  and  $Q_{\text{ts}}$  represent the equilibrium adsorption of the OVA in the pseudo-  
56 first-order and pseudo-second-order kinetic equations, respectively. It can be seen from Table  
57 S2 that the linear correlation coefficient ( $R^2$ ) of pseudo-second-order dynamics is greater than  
58 that of pseudo-first-order dynamics. It shows that the material is more consistent with the  
59 pseudo-second-order dynamics model. It is suggested that the adsorption process is mainly  
60 controlled by the chemical interaction between adsorbents and OVA.

61        The adsorption amount obtained by adsorption equilibrium is of great significance for  
62 the optimization of adsorbents. As shown in Fig. S4 (C) and (D), Langmuir adsorption  
63 isotherm model and Freundlich adsorption isotherm model were used to evaluate the  
64 adsorption capacity. Table S3 shows the relevant fitting data calculated according to Eqs. (3)  
65 and (4). The Langmuir linear correlation coefficient is ( $R^2 = 0.9716, 0.9422$ ) and the  
66 Freundlich linear correlation coefficient is ( $R^2 = 0.4125, 0.4020$ ), indicating that the  
67 adsorption conforms to the Langmuir adsorption model.

68 **Captions**

69 **Fig. S1** Zeta potential of Zr-MOF, Zr-MOF@SH, and Zr-MOF@S-S@B.

70 **Fig. S2** Optimization of synthesis conditions (A) MPTES content, (B) MPBA content.

71 **Fig. S3** Effect of adsorption time on adsorption capacity.

72 **Fig. S4** (A) Pseudo-first-order kinetic model, (B) pseudo-second-order kinetic model, (C)  
73 Langmuir model, (D) Freundlich model.

74 **Fig. S5** Selective adsorption capacities of Zr-MOF, Zr-MOF@SH, and Zr-MOF@S-S@B  
75 towards OVA, HRP, BSA, and Lyz.

76 **Fig. S6** Reusability of Zr-MOF@S-S@B.

77 **Fig. S7** CD images of OVA and OVA eluent.

78 **Fig. S8** UV spectra of protein powder solution (1.0 mg mL<sup>-1</sup>), protein powder solution  
79 pretreated by Zr-MOF@S-S@B, eluted by DTT.

80 **Table S1** Element content of Zr-MOF@S-S@B.

81 **Table S2** Pseudo-first-order and pseudo-second-order adsorption kinetics model data  
82 parameters.

83 **Table S3** The data parameters of Langmuir model and Freundlich model.

84

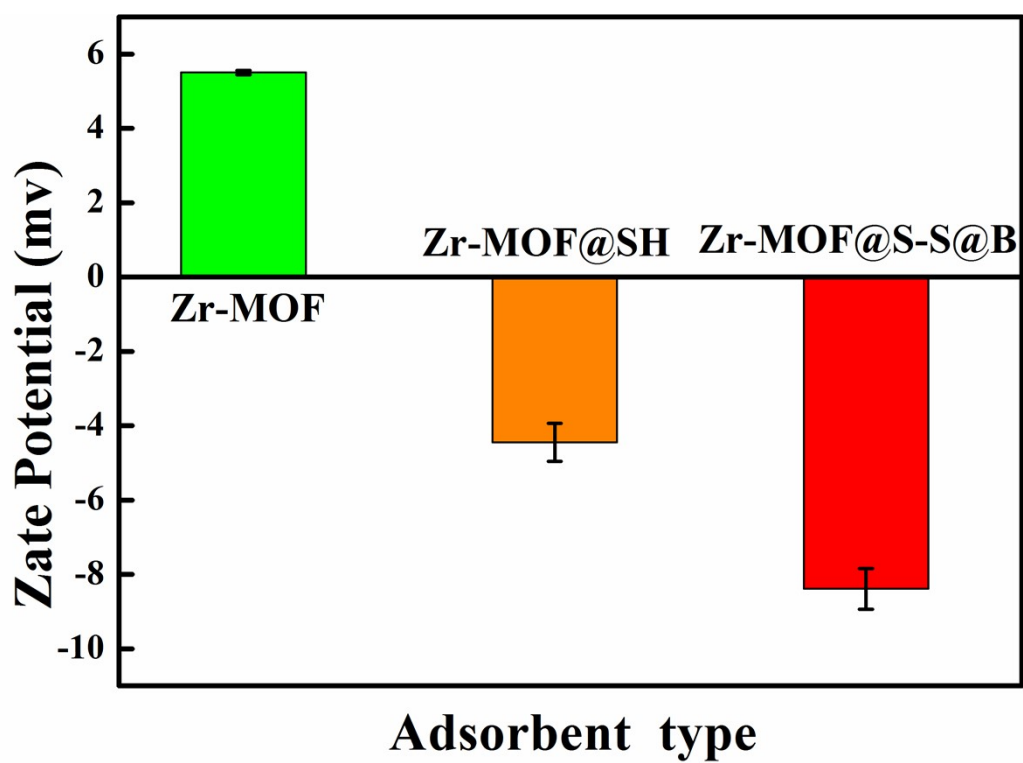

85

86 **Fig. S1** Zeta potential of Zr-MOF, Zr-MOF@SH, and Zr-MOF@S-S@B.

87

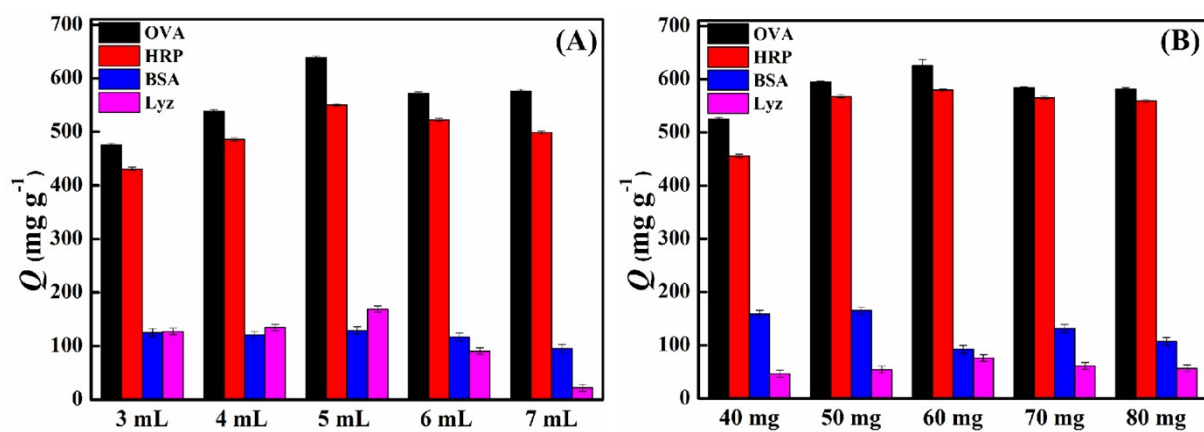

88

89 **Fig. S2** Optimization of synthesis conditions (A) MPDES content, (B) MPBA content.

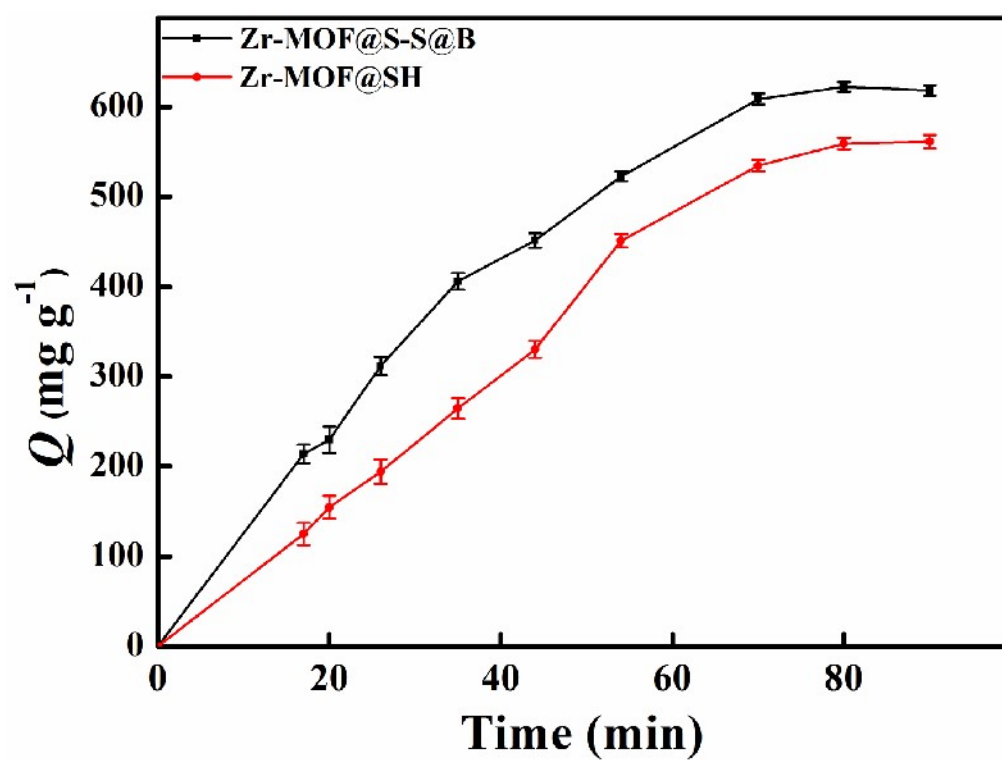

90

91 **Fig. S3** Effect of adsorption time on adsorption capacity.

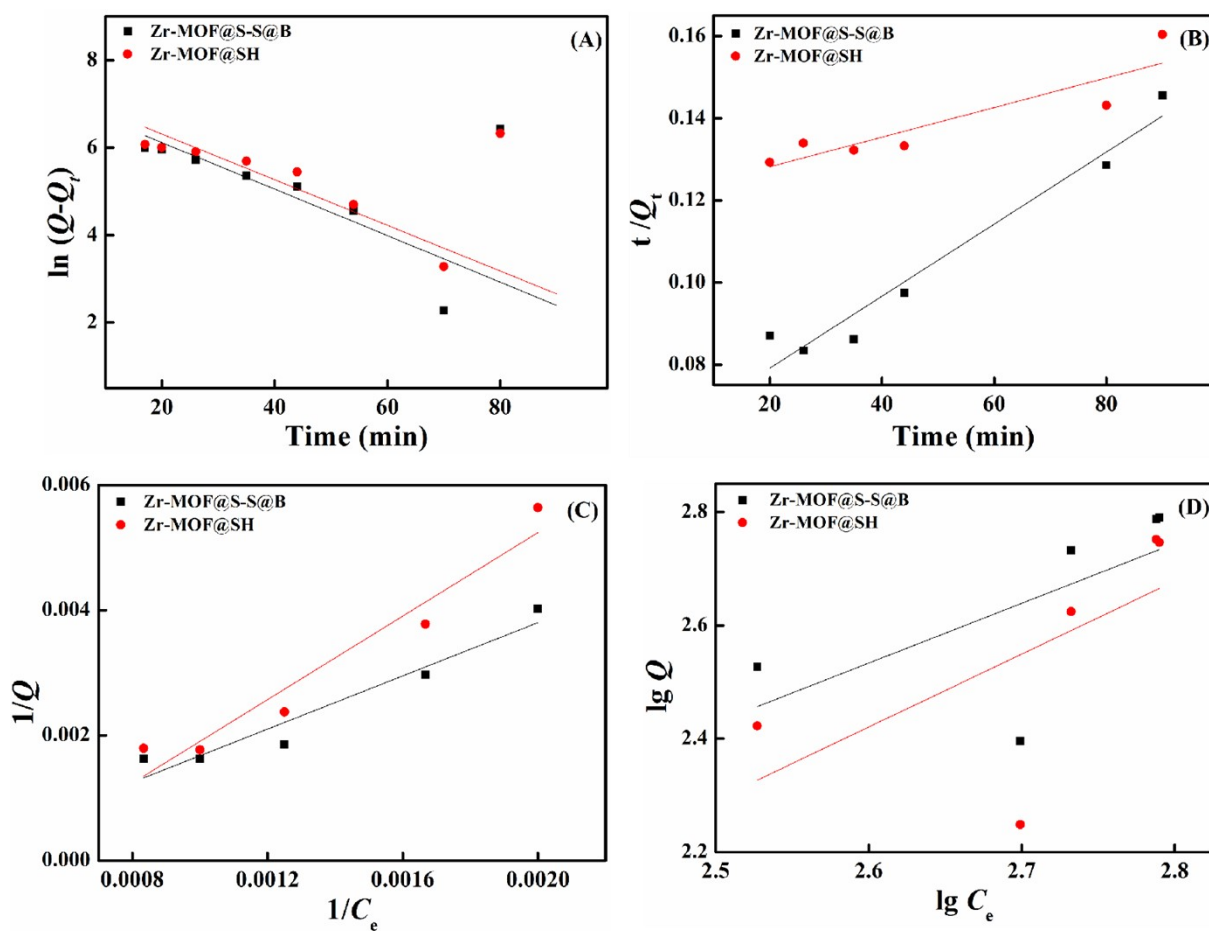

94 **Fig. S4** (A) Pseudo-first-order kinetic model, (B) pseudo-second-order kinetic model, (C)  
 95 Langmuir model, (D) Freundlich model.

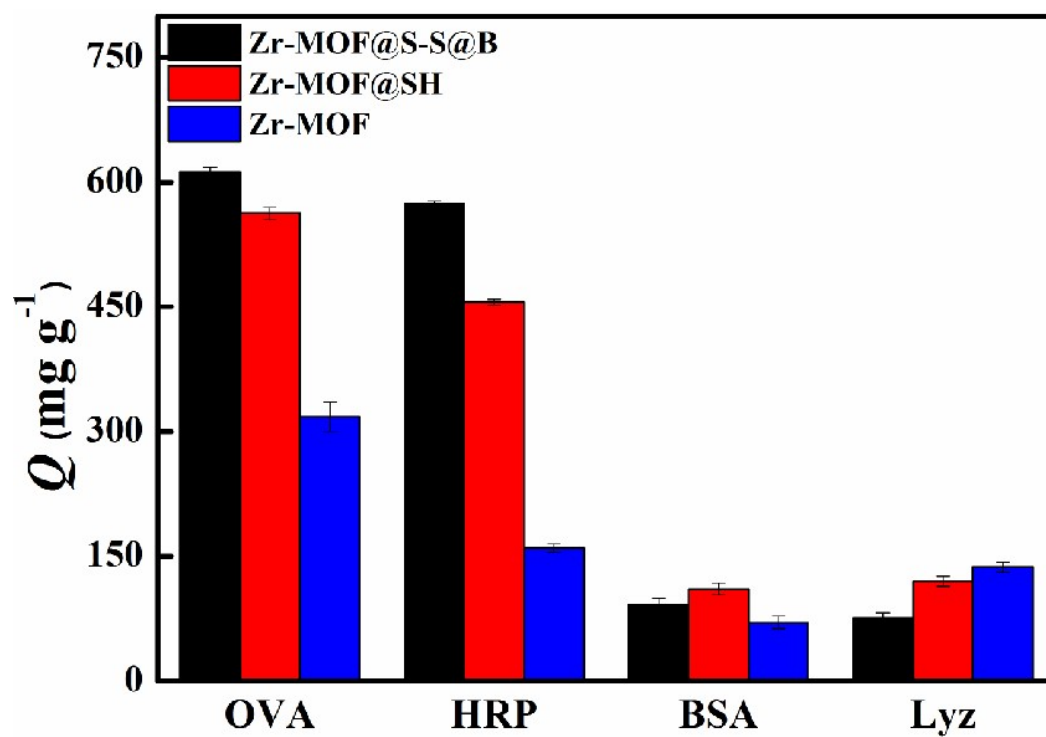

97

98 **Fig. S5** Selective adsorption capacities of Zr-MOF, Zr-MOF@SH, and Zr-MOF@S-S@B  
 99 towards OVA, HRP, BSA, and Lyz.

100

101

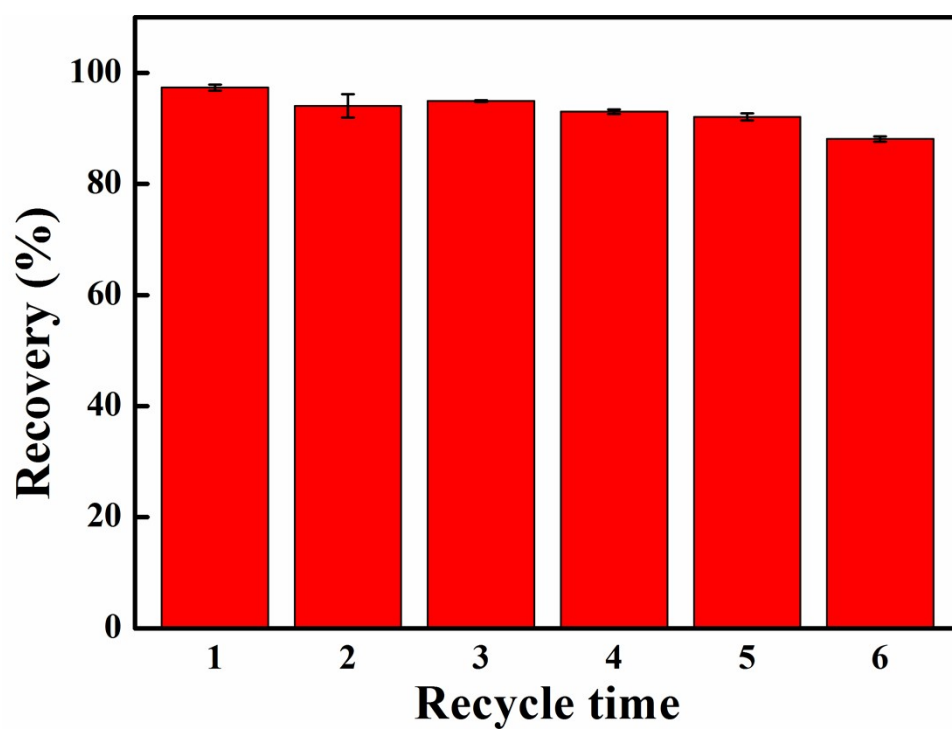

102

103 **Fig. S6** Reusability of Zr-MOF@S-S@B.

104

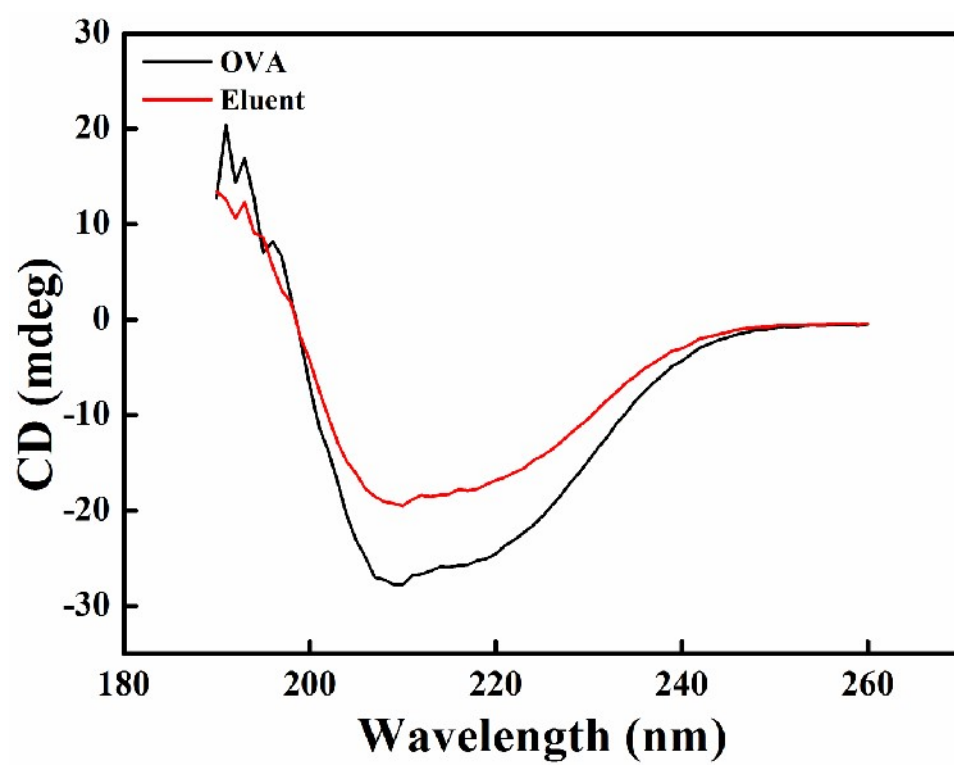

105

106 **Fig. S7** CD images of OVA and OVA eluent.

107

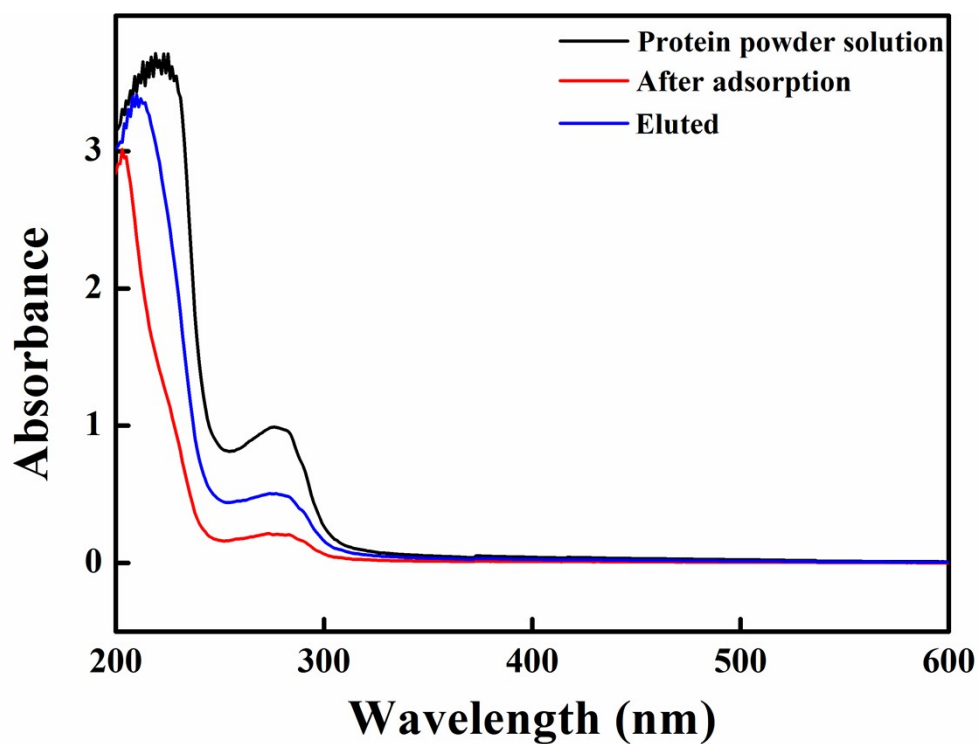

108

109

110 **Fig. S8** UV spectra of protein powder solution (1.0 mg mL<sup>-1</sup>), protein powder solution  
111 pretreated by Zr-MOF@S-S@B, eluted by DTT.

112

113

114 **Table S1** Element content of Zr-MOF@S-S@B.

| Element | Element weight (%) |
|---------|--------------------|
| C1s     | 57.04              |
| B1s     | 23.24              |
| O1s     | 18.31              |
| S2p     | 0.41               |

**Table S2** Pseudo-first-order and pseudo-second-order adsorption kinetics model data parameters.

| Adsorbents   | $Q_{\text{exp}}$<br>(mg g <sup>-1</sup> ) | Pseudo-first-order kinetic model         |                               |        | Pseudo-second-order kinetic model        |                                                  |        | $h$<br>(mg g <sup>-1</sup> min <sup>-1</sup> ) | $t_{1/2}$<br>(min) |
|--------------|-------------------------------------------|------------------------------------------|-------------------------------|--------|------------------------------------------|--------------------------------------------------|--------|------------------------------------------------|--------------------|
|              |                                           | $Q_{\text{tf}}$<br>(mg g <sup>-1</sup> ) | $k_1$<br>(min <sup>-1</sup> ) | $R^2$  | $Q_{\text{ts}}$<br>(mg g <sup>-1</sup> ) | $k_2$<br>(g mg <sup>-1</sup> min <sup>-1</sup> ) | $R^2$  |                                                |                    |
|              |                                           |                                          |                               |        |                                          |                                                  |        |                                                |                    |
| Zr-MOF@S-S@B | 625.5                                     | 1295.6                                   | 0.0532                        | 0.4521 | 598.8                                    | 0.0035                                           | 0.9579 | 16.23                                          | 67.93              |
| Zr-MOF@SH    | 558.9                                     | 1496.6                                   | 0.0522                        | 0.4695 | 522.9                                    | 0.0076                                           | 0.8187 | 82.63                                          | 30.26              |

**Table S3** The data parameters of Langmuir model and Freundlich model.

| Adsorbents   | Langmuir model        |                        |        | Freundlich model      |       |        |
|--------------|-----------------------|------------------------|--------|-----------------------|-------|--------|
|              | $Q_m$                 | $K_L$                  | $R^2$  | $K_F$                 | $1/n$ | $R^2$  |
|              | (mg g <sup>-1</sup> ) | (mL mg <sup>-1</sup> ) |        | (mg g <sup>-1</sup> ) |       |        |
| Zr-MOF@S-S@B | 1000                  | 4.068×10 <sup>-4</sup> | 0.9716 | 0.6210                | 1.054 | 0.4125 |
|              | 714.2                 | 4.194×10 <sup>-4</sup> | 0.9422 | 0.1192                | 1.286 | 0.4020 |
